# Supplementary material for: Poly(A)-specific ribonuclease is a nuclear ribosome biogenesis factor involved in human 18S rRNA maturation
Source: PubMed Central journal article supplement — Nucleic Acids Res. 2017 Apr 10;45(11):6822–36. doi: 10.1093/nar/gkx253 (PMC5499762; doi:10.1093/nar/gkx253), 2017-04-10

**SUPPLEMENTAL MATERIAL** (Poly(A)-specific ribonuclease is a nuclear ribosome biogenesis factor involved in human 18S rRNA maturation; Montellese et al. 2017)

**Supplemental Table 1**

List of primers used for site-directed mutagenesis, *in vitro* transcription and RNase H assays

|                      |                                                               |
|----------------------|---------------------------------------------------------------|
| PARN-1_siMut forward | 5'-CTCCAGCATCGATTTCTTAGCAAGCC-3'                              |
| PARN-1_siMut reverse | 5'-CTCTGACAAACAAATTTGACATCTGGTG-3'                            |
| PARN-H377A forward   | 5'-CAACTTGCCGAGGCAGGC-3'                                      |
| PARN-H377A reverse   | 5'-TTCAGAGGCTGTGTCATAACTTGAAAAAC-3'                           |
| OHA416               | 5'-GGGCCGGATCCTAATACGACTCACTATAGGGTTCCGTAGGTGAACCTGCGGAAGG-3' |
| OHA418               | 5'-GGCGGAAGCTTGCAGTGGCGGTGGGGGGTGGGTGTGCGGAGGG-3'             |
| ITS1-Hs-RACE         | 5'-CGCGAATTCGATCATTAACGGAGCCCGGAG-3'                          |
| RNaseH_1             | 5'-TTTACTTCTCTAGATAGTCAAGTTCGACC-3'                           |
| RNaseH_2             | 5'-TGTTACGACTTTTACTTCTCTAGATAGTC-3'                           |

**Supplemental Table 2**

List of target genes and siRNA sequences used in the present study

| Gene         | GenBank accession # | siRNA     | siRNA sequence                     |
|--------------|---------------------|-----------|------------------------------------|
| <i>PARN</i>  | NM_002582.3         | siPARN-1  | 5'-GCUCCAGCAUUGACUUUCUdTdT-3'      |
|              |                     | siPARN-3  | 5'-GCAGAAACAUGCCAAAGAAAdTdT-3'     |
|              |                     | siPARN-5  | 5'-AAGCUAUCGGAUCCAAACCUAdTdT-3'    |
|              |                     | siPARN-6  | 5'-AGGACCAGACUUGCAGCCUAAAdTdT-3'   |
| <i>NOB1</i>  | NM_014062.2         | siNOB1-1Q | 5'-CGCCCUGGAGCCAAUCUUCAdTdT-3'     |
|              |                     | siNOB1-2Q | 5'-UUGCCCAACAUCGAUCAUGAAAdTdT-3'   |
|              |                     | siNOB1-3  | 5'-AAGGUUAAGGUGAGCUCAUCGdTdT-3'    |
| <i>PAPD5</i> | NM_001040284.2      | siPAPD5-5 | 5'-GGACGACACUCAAUUUUdTdT-3'        |
|              |                     | siPAPD5-6 | 5'-GGCCUUUGAUUAUGCCUACGUUGUdTdT-3' |
| <i>PAPD7</i> | NM_006999.4         | siPAPD7-3 | 5'-CGCCGAAAGUACUUUAGGAdTdT-3'      |
|              |                     | siPAPD7-5 | 5'-CCACCACUCCAGAACACUGAUCAUdTdT-3' |
| <i>LSG1</i>  | NM_018385.2         | siLSG1    | 5'-AGACCAAACUGGAACCAA-3'           |
| <i>eIF6</i>  | NM_001267810.1      | siEIF6    | 5'-GAGCUUCGUUCGAGAACA-3'           |
| <i>CRM1</i>  | NM_003400.3         | siCRM1    | 5'-UGUGGUGAAUUGCUUAUAC-3'          |
| <i>ENP1</i>  | NM_004053.3         | siENP1    | 5'-AGCGTGCCATAGAGATGTT-3'          |
| <i>CK1δ</i>  | NM_001893.4,        | siCK1δ    | 5'-CCATCGAAGTGTGTGTAA-3'           |
| <i>CK1ε</i>  | NM_001894.4         | siCK1ε    | 5'-ACATCGAGAGCAAGTTCTA-3'          |
| <i>RIO2</i>  | NM_018343.2         | siRIO2    | 5'-GGAUCUUGGAUAUGUUUA-3'           |
| <i>LTV1</i>  | NM_032860.4         | siLTV1    | 5'-UGGCAGUGAUCUCCUAAA-3'           |
| <i>RPS2</i>  | NM_002952           | siRPS2-2  | 5'-CCAGGUUCAAGGCAUUUGUdTdT-3'      |

|              |           |           |                                |
|--------------|-----------|-----------|--------------------------------|
| <i>RPS3</i>  | NM_001005 | siRPS3-2  | 5'-CCAGGACAGAAAUCAUUAUdTdT-3'  |
| <i>RPS10</i> | NM_001014 | siRPS10-1 | 5'-GAACCGGAUUGCCAUUUAUdTdT-3'  |
| <i>RPS11</i> | NM_001015 | siRPS11-1 | 5'-GCGCCACAAGAACAUGUCUdTdT-3'  |
| <i>RPS15</i> | NM_001018 | siRPS15-2 | 5'-UCACCUACAAGCCCGUAAAdTdT-3'  |
| <i>RPS17</i> | NM_001021 | siRPS17-2 | 5'-GCAGGUUAUGUCACGCAUCdTdT-3'  |
| <i>RPS21</i> | NM_001024 | siRPS21-1 | 5'-GGAUGGGUGAGUCAGAUGAdTdT-3'  |
| <i>RPS23</i> | NM_001025 | siRPS23-1 | 5'-GGGUCCAGCUGAUCAAGAAAdTdT-3' |
| <i>RPS24</i> | NM_033022 | siRPS24-1 | 5'-CACCGGAUGUCAUCUUUGUdTdT-3'  |
| <i>RPS26</i> | NM_001029 | siRPS26-1 | 5'-GGACAAGGCCAUUAAGAAAdTdT-3'  |
| <i>RPS29</i> | NM_001032 | siRPS29-1 | 5'-CGGUCUGAUCCGGAAAUAUdTdT-3'  |

### Supplemental Table 3

List of probes used in Northern blot

|         |                                      |
|---------|--------------------------------------|
| 5'ETS   | 5'-AGACGAGAACGCCTGACACGCACGGCAC-3'   |
| 5'ITS1  | 5'-CCTCGCCCTCCGGGCTCCGTTAATGATC-3'   |
| ITS1-38 | 5'-GGAGGGAAGCGCGCGGCGGC-3'           |
| ITS1-49 | 5'-GGTGGGTGTGCGGAGGGAAG-3'           |
| ITS1-59 | 5'-GCGGTGGGGGGGTGGGTGTG-3'           |
| ITS2-1  | 5'-CTGCGAGGGAACCCCCAGCCGCGCA-3'      |
| ITS2-2  | 5'-GCGCGACGGCGGACGACACCGCGGCGTC-3'   |
| 18S     | 5'-TTTACTTCCTCTAGATAGTCAAGTTCGACC-3' |
| 28S     | 5'-CCCGTTCCTTGGCTGTGGTTTCGCTAGATA-3' |

### Legends of the Supplemental Figures

#### Supplemental Figure S1: Endo- and exonucleolytic cleavages during pre-ribosomal RNA processing in human cells

This schematic representation summarizes the endo- and exonucleolytic steps undertaken in human cells to release ribosomal RNA sequences, as reported in the literature and described in the present study. Separation between pre-40S and pre-60S precursors occurs after endonucleolytic cleavage at site 2. Cleavage at site E releases the last 18S precursor, 18S-E pre-rRNA, corresponding to the sequence of 18S rRNA flanked in 3' by a portion of ITS1, 78 or 81 nt in length. This full-length precursor is referred to as 18S-E<sub>FL</sub> pre-rRNAs in the present study. In the cytoplasm, 18S-E precursors are poly-uridylylated by an uncharacterized TUTase and processed into shorter pre-rRNAs<sup>1</sup>. These precursors are then finally cleaved by the endonuclease NOB1, which releases the 18S rRNA 3' end<sup>1,2</sup>. Upon knockdown of PARN, 18S-E<sub>FL</sub> precursors can be exported to the cytoplasm and further processed, although less efficiently. Concerning the large ribosomal subunit pathway, two 5.8S rRNAs varying by 5 nt in their 5' extremity are produced (5.8S<sub>L</sub> and 5.8S<sub>S</sub>), although it is not known whether the longest form is obtained through endonucleolytic cleavage as in *Saccharomyces cerevisiae*. So far, the 3'-5' exoRNase ER11, acting on cytoplasmic 6S precursors, has only been described in

<sup>1</sup> Preti, M., O'Donohue, M.F., Montel-Lehry, N., Bortolin-Cavaille, M.L., Choismel, V. and Gleizes, P.E. (2013) Gradual processing of the ITS1 from the nucleolus to the cytoplasm during synthesis of the human 18S rRNA. *Nucleic acids research*, **41**, 4709-4723

<sup>2</sup> Sloan, K.E., Mattijssen, S., Lebaron, S., Tollrvey, D., Pruijn, G.J. and Watkins, N.J. (2013) Both endonucleolytic and exonucleolytic cleavage mediate ITS1 removal during human ribosomal RNA processing. *The Journal of cell biology*, **200**, 577-588.

mouse cells<sup>3</sup>. Several exoRNases, such as XRN2 or RRP6, are also involved in the degradation of transcribed spacers released after endonucleolytic cleavages.

#### **Supplemental Figure S2: Assessment of the functionality of HAST-tagged PARN and PARN H377A**

(A) Nuclear localization of PARN assessed with an anti-PARN antibody. PARN labeling is mainly seen in nucleoli (Nol), but a weaker signal is also seen in the nucleoplasm (Np). White arrowheads indicate the putative positions of a few fibrillar centers, which correspond to unlabeled areas. Scale bar, 5  $\mu$ m. (B) IF analysis of PARN after depletion of the export factor CRM1 (positive control) and 60S RBFs (LSG1, eIF6). Scale bar, 20  $\mu$ m. (C) Western blot analysis shows the efficiency of the knockdowns shown in Fig. 1F. (D) IF using an anti-HA antibody revealed that the intracellular localization of HAST-tagged PARN (w.t.) is similar to that of endogenous PARN displayed in (A). Similar results were obtained when HAST-tagged PARN was silently mutated to be insensitive to the action of the siRNA PARN-1 (siMut), or further mutated to provide a catalytically-dead form of the enzyme (HAST-PARN-H377A). (E) Purification of pre-40S particles with HAST-tagged PARN (w.t.) or HAST-tagged PARN-H377A led to similar profiles after silver staining.

#### **Supplemental Figure S3: Western blot analysis of HeLa cells expressing HAST-tagged version of PARN and PARN H377A**

As displayed on Figure 2E, HeLa cells treated with a scramble siRNA or siRNA PARN-1 were rescued with plasmids allowing expression of either an HAST-tagged version of PARN silently mutated to render it insensitive to siRNA PARN-1 (pPARN), or a catalytically inactive PARN mutant (pPARN-H377A). The empty plasmid (pHAST) was used as a control. Total protein samples were analyzed by Western blot and revealed with antibodies directed against PARN, the HA tag, or  $\beta$ -actin.

#### **Supplemental Figure S4: Analysis of neo-synthesized RNAs in siRNA-depleted HeLa cells**

In a parallel experiment to that presented on Fig. 2F, HeLa cells depleted of NOB1, or co-depleted of NOB1 and PARN, were pulse labeled with L-methyl <sup>3</sup>H methionine. Cells were harvested and total RNAs were analyzed as described in the corresponding legend. The gel on the left is identical to that displayed on Fig. 2F.

#### **Supplemental Figure S5: Impact of PARN depletion on quality control**

(A) Northern blot analyses of PARN co-depletion with RPSs that provoke an increase of 18S-E pre-rRNAs (see Fig. 4D for quantifications). (B) Northern blot analysis of RPS24, RPS23 or RPS11 depletions, which led to a strong accumulation of 30S pre-rRNAs, or of co-depletion of these RPSs with PARN. The graph presents the ratios of 30S pre-rRNA relative to 28S rRNA for each experimental condition. (C) An accumulation of abortive transcripts was induced by a low dose of actinomycin D in control cells and cells depleted of RPS26 or PARN, or co-depleted for RPS26 and PARN. Total RNAs were isolated after the indicated times and analyzed by Northern hybridization with 5'ITS1, ITS1-59 and 5'ETS probes.

---

<sup>3</sup> Ansel, K.M., Pastor, W.A., Rath, N., Lapan, A.D., Glasmacher, E., Wolf, C., Smith, L.C., Papadopoulou, N., Lamperti, E.D., Tahiliani, M. *et al.* (2008) Mouse Eri1 interacts with the ribosome and catalyzes 5.8S rRNA processing. *Nature structural & molecular biology*, **15**, 523-530.

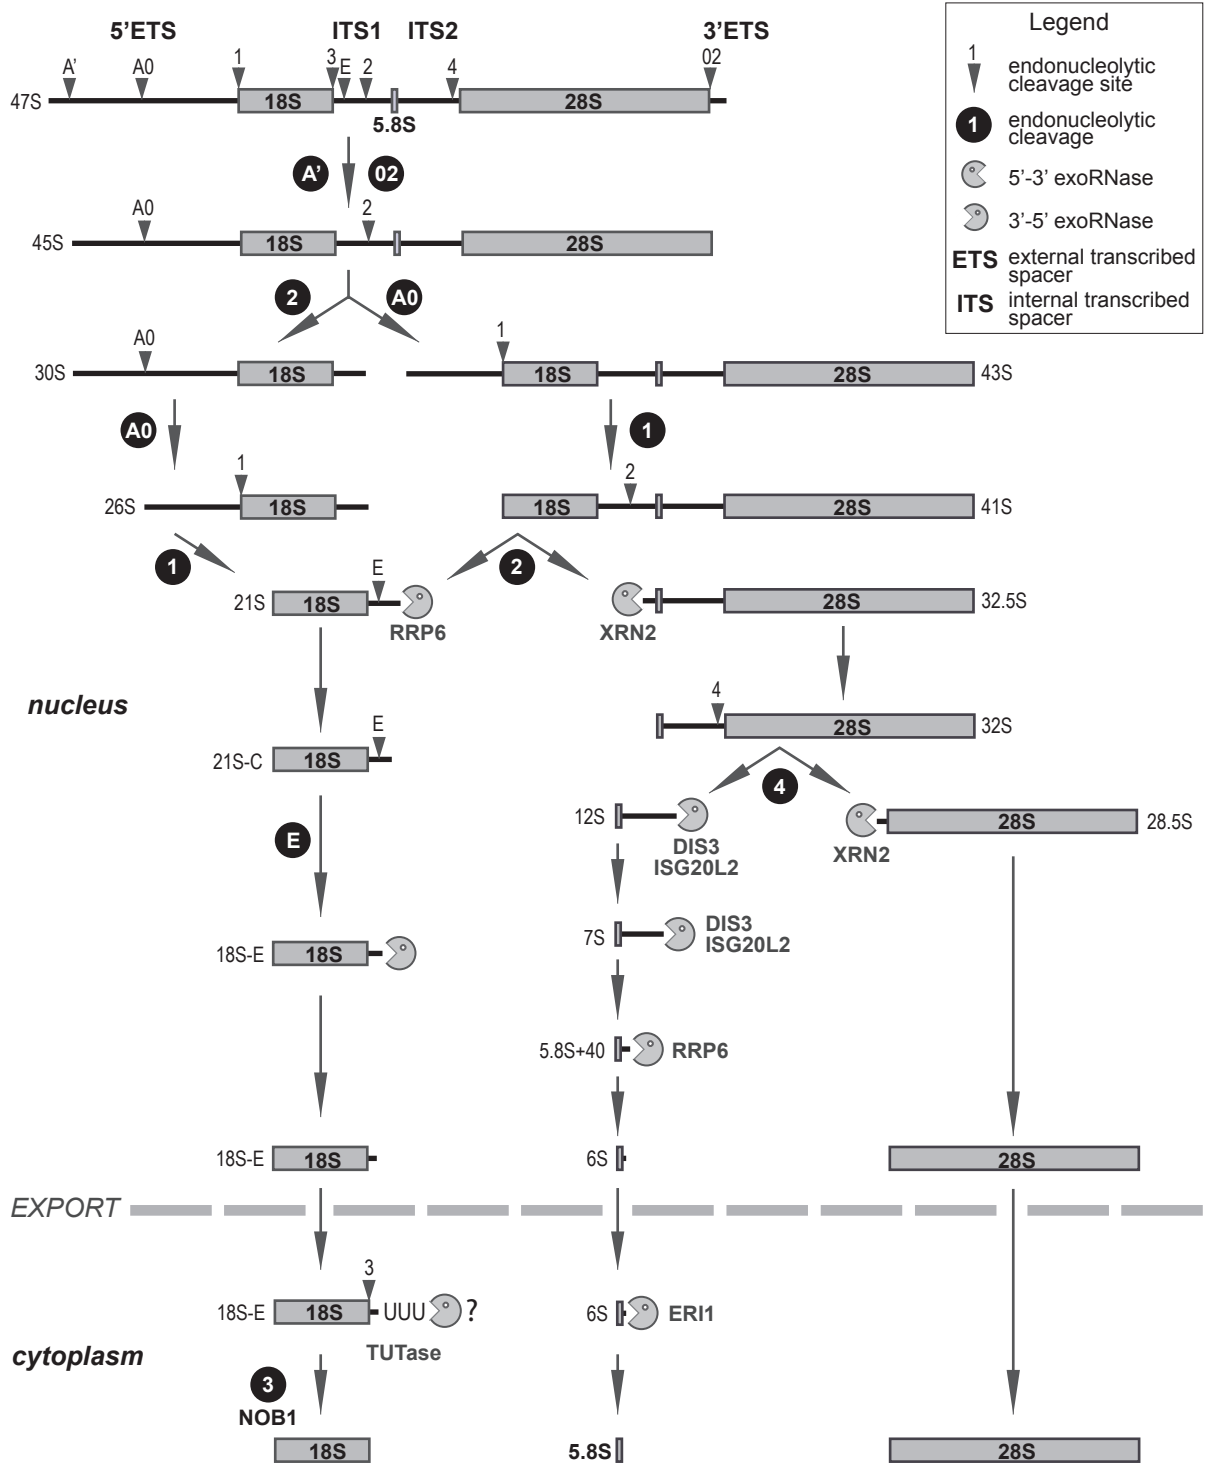

Supplemental Figure S1

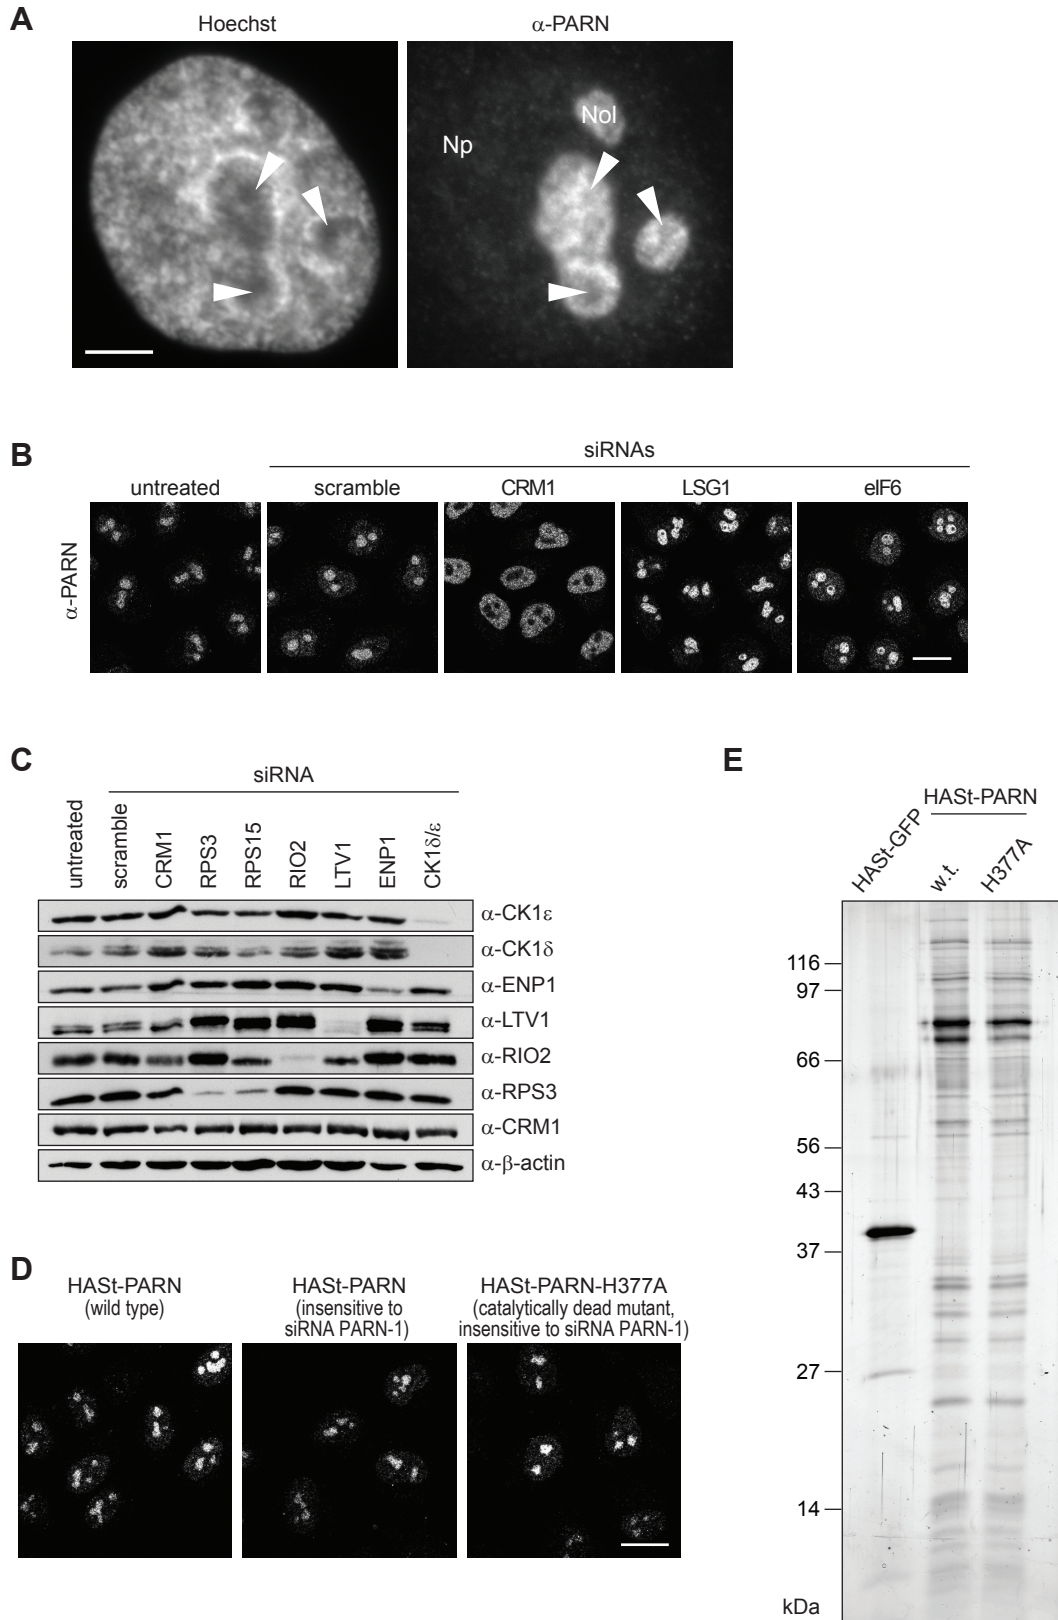

Supplemental Figure S2

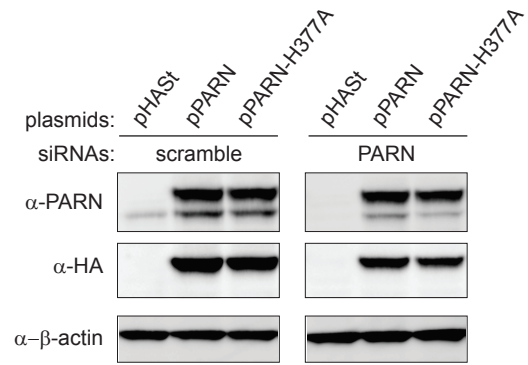

Supplemental Figure S3

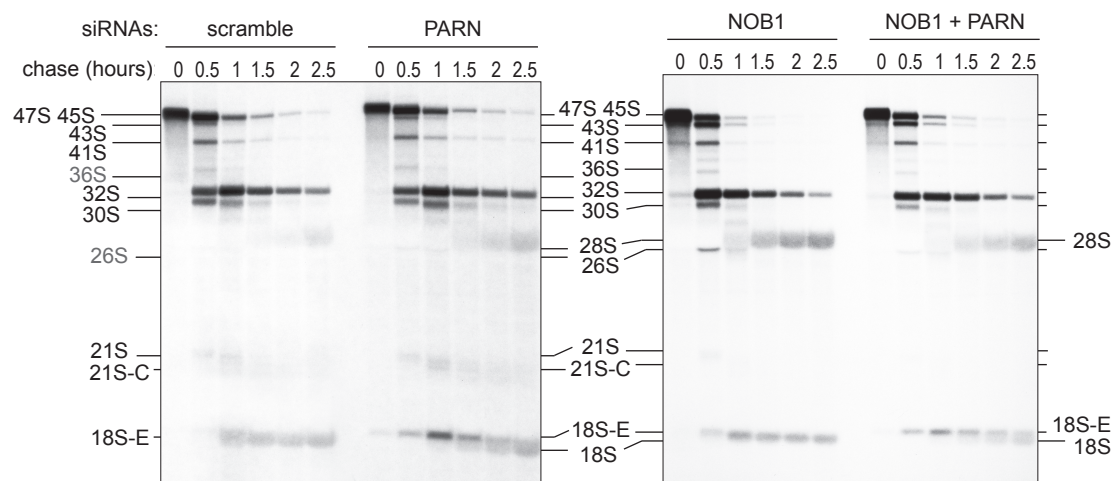

Supplemental Figure S4

**A**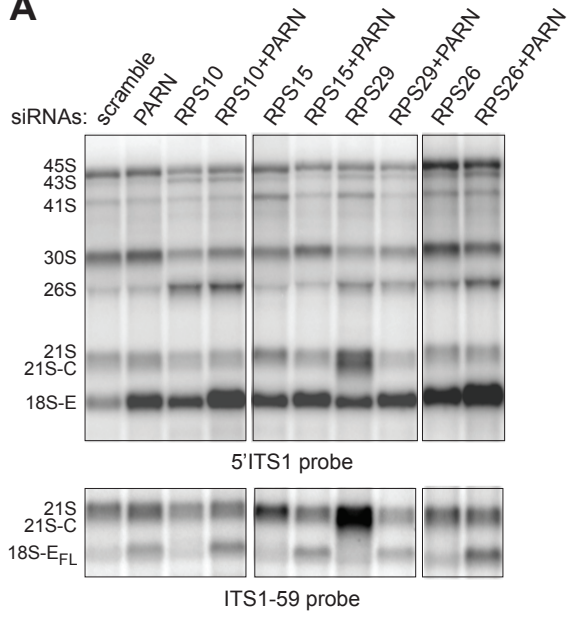**B**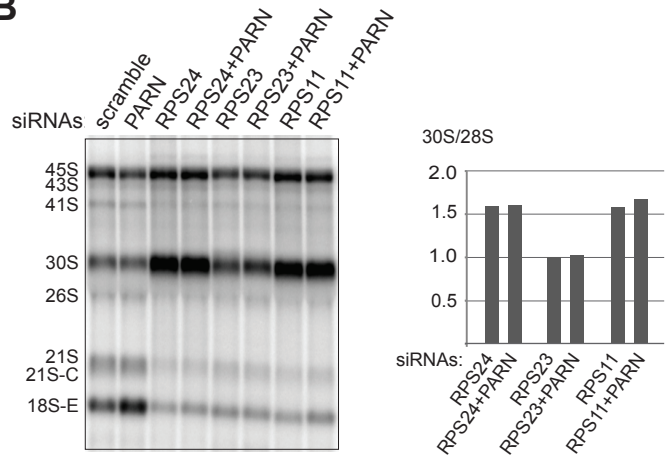**C**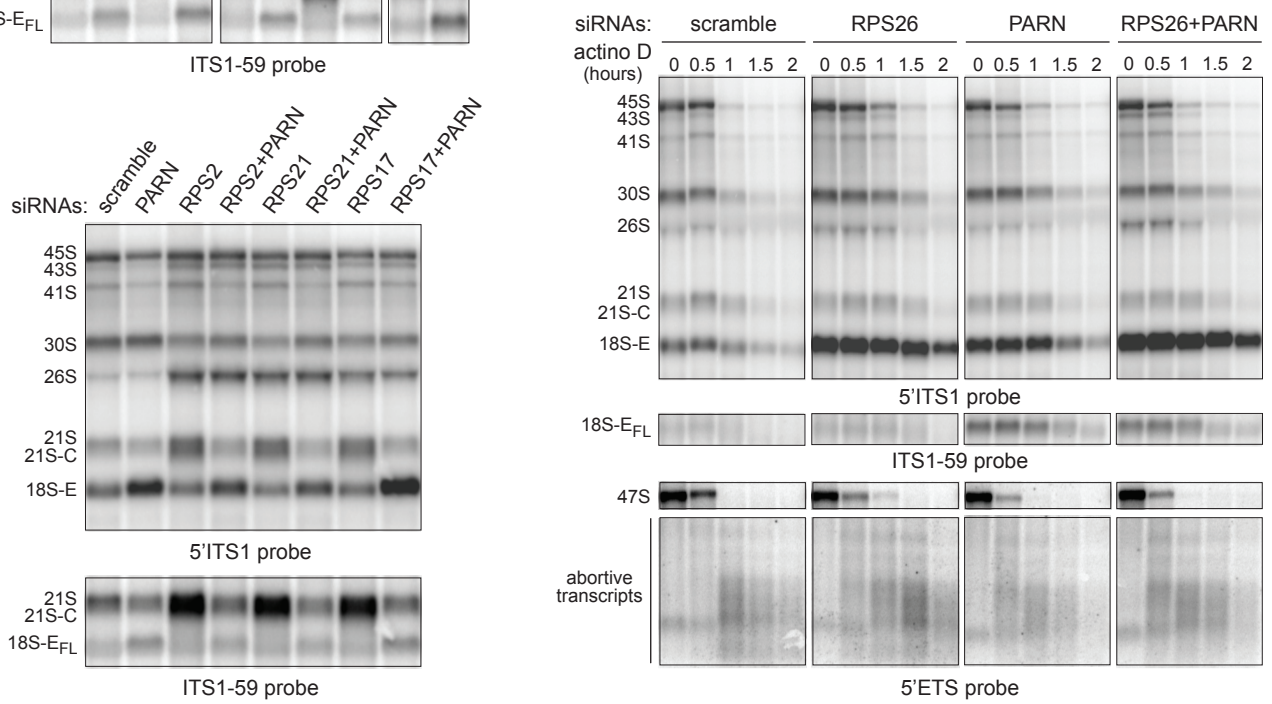

Supplement: gkx253_Supp.pdf [file gkx253_Supp.pdf]
